# Supplementary material
Source: PubMed Central journal article supplement (PMC2999486)

# Supplemental Figure 1 A

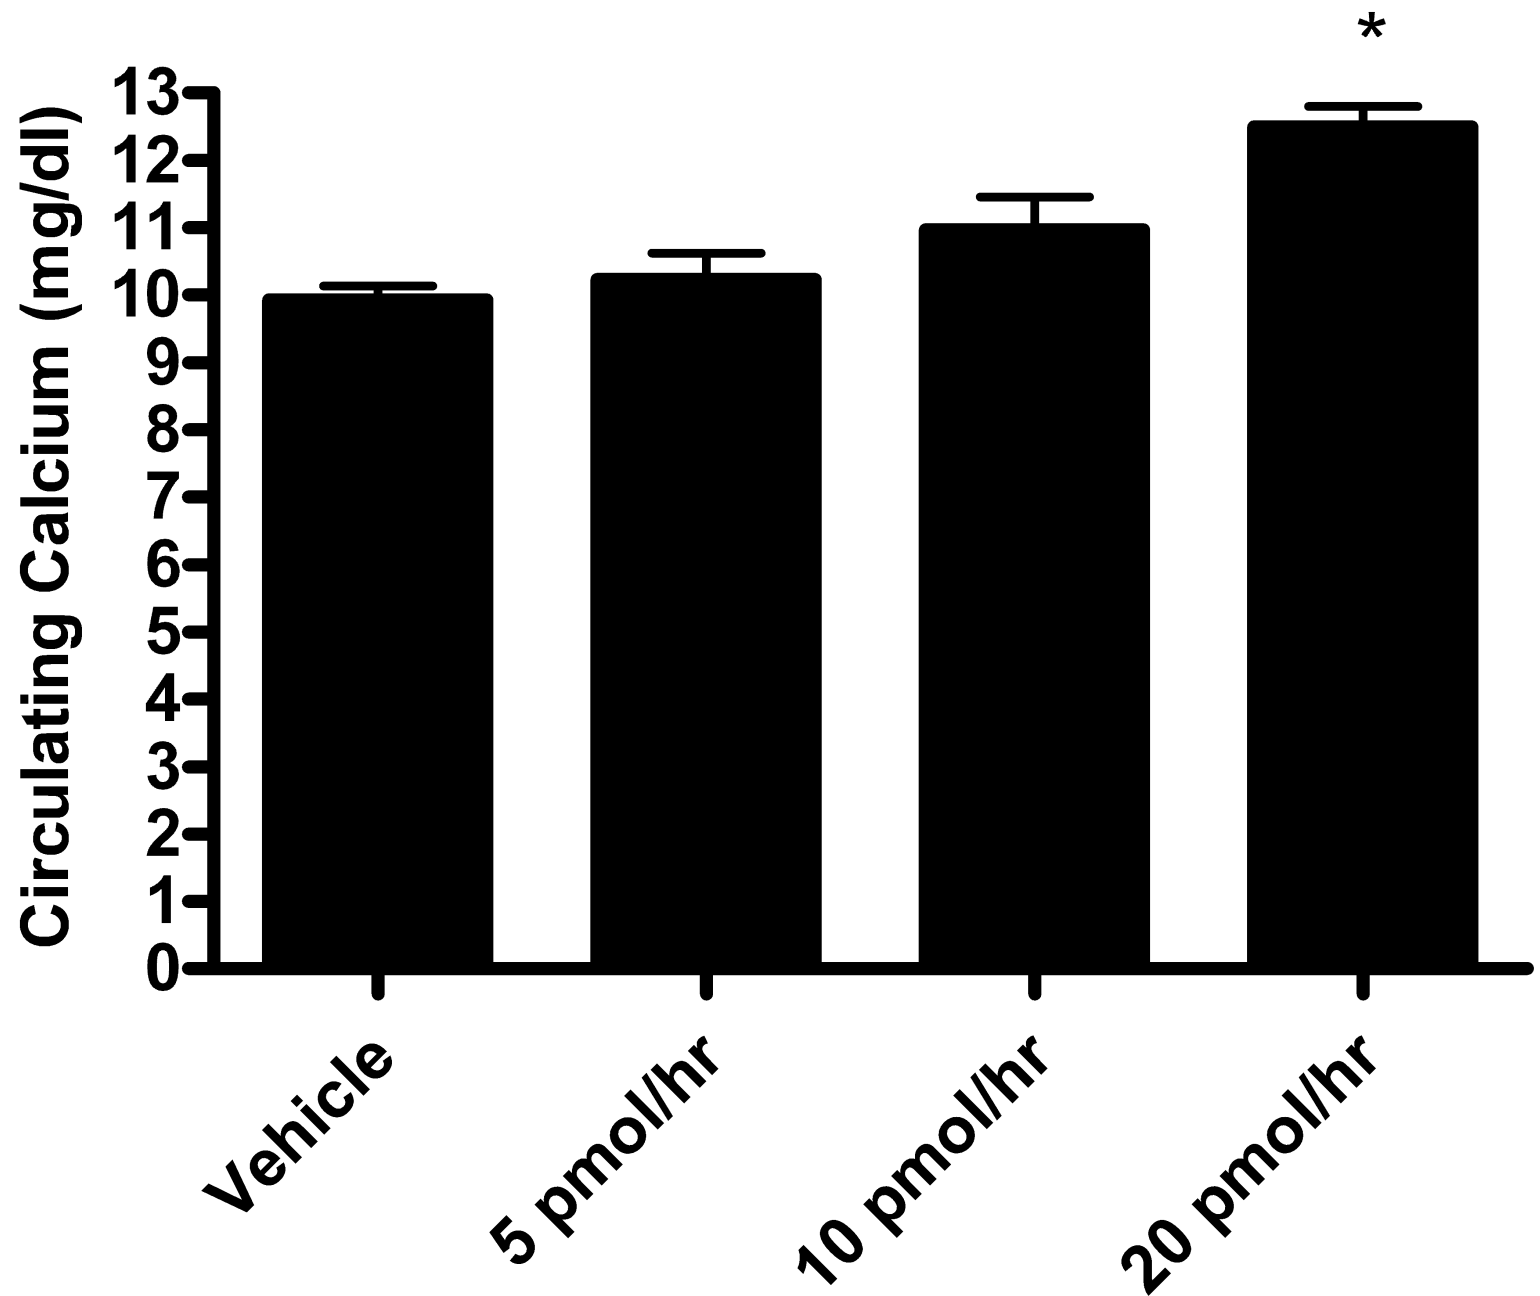

# Supplemental Figure 1 B

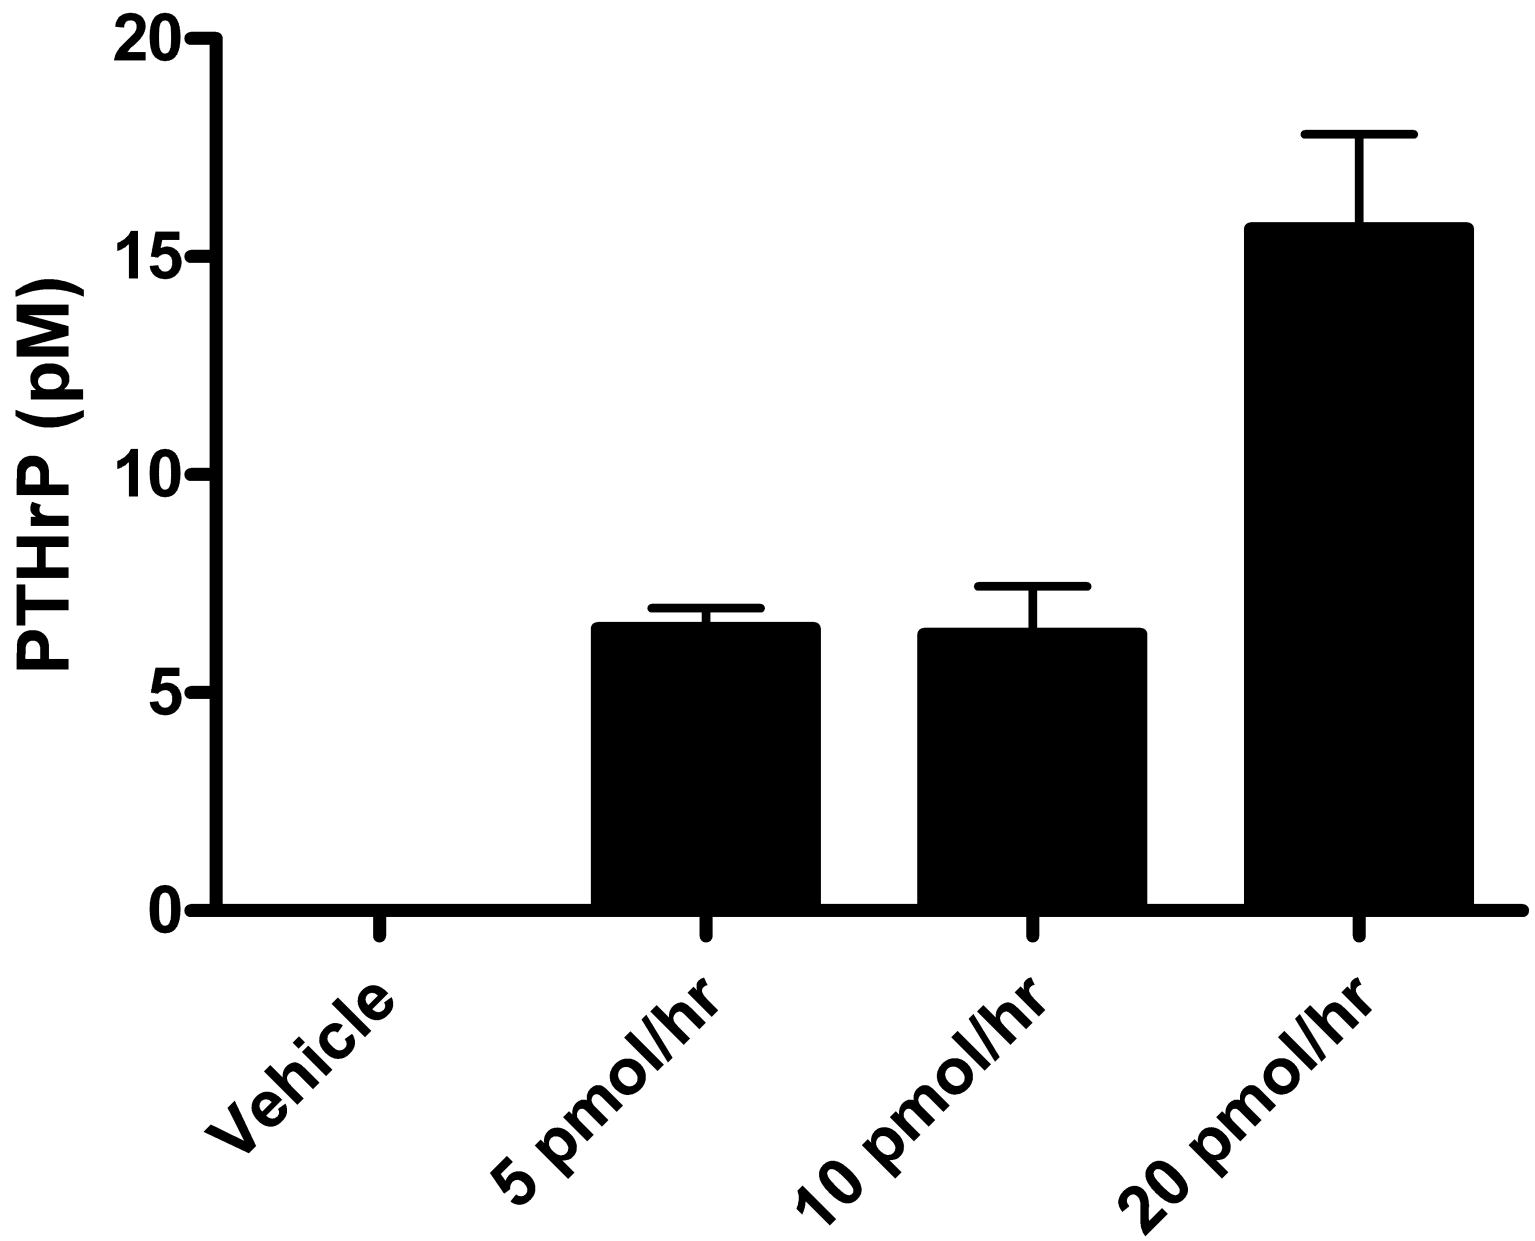

## Supplemental Figure 2

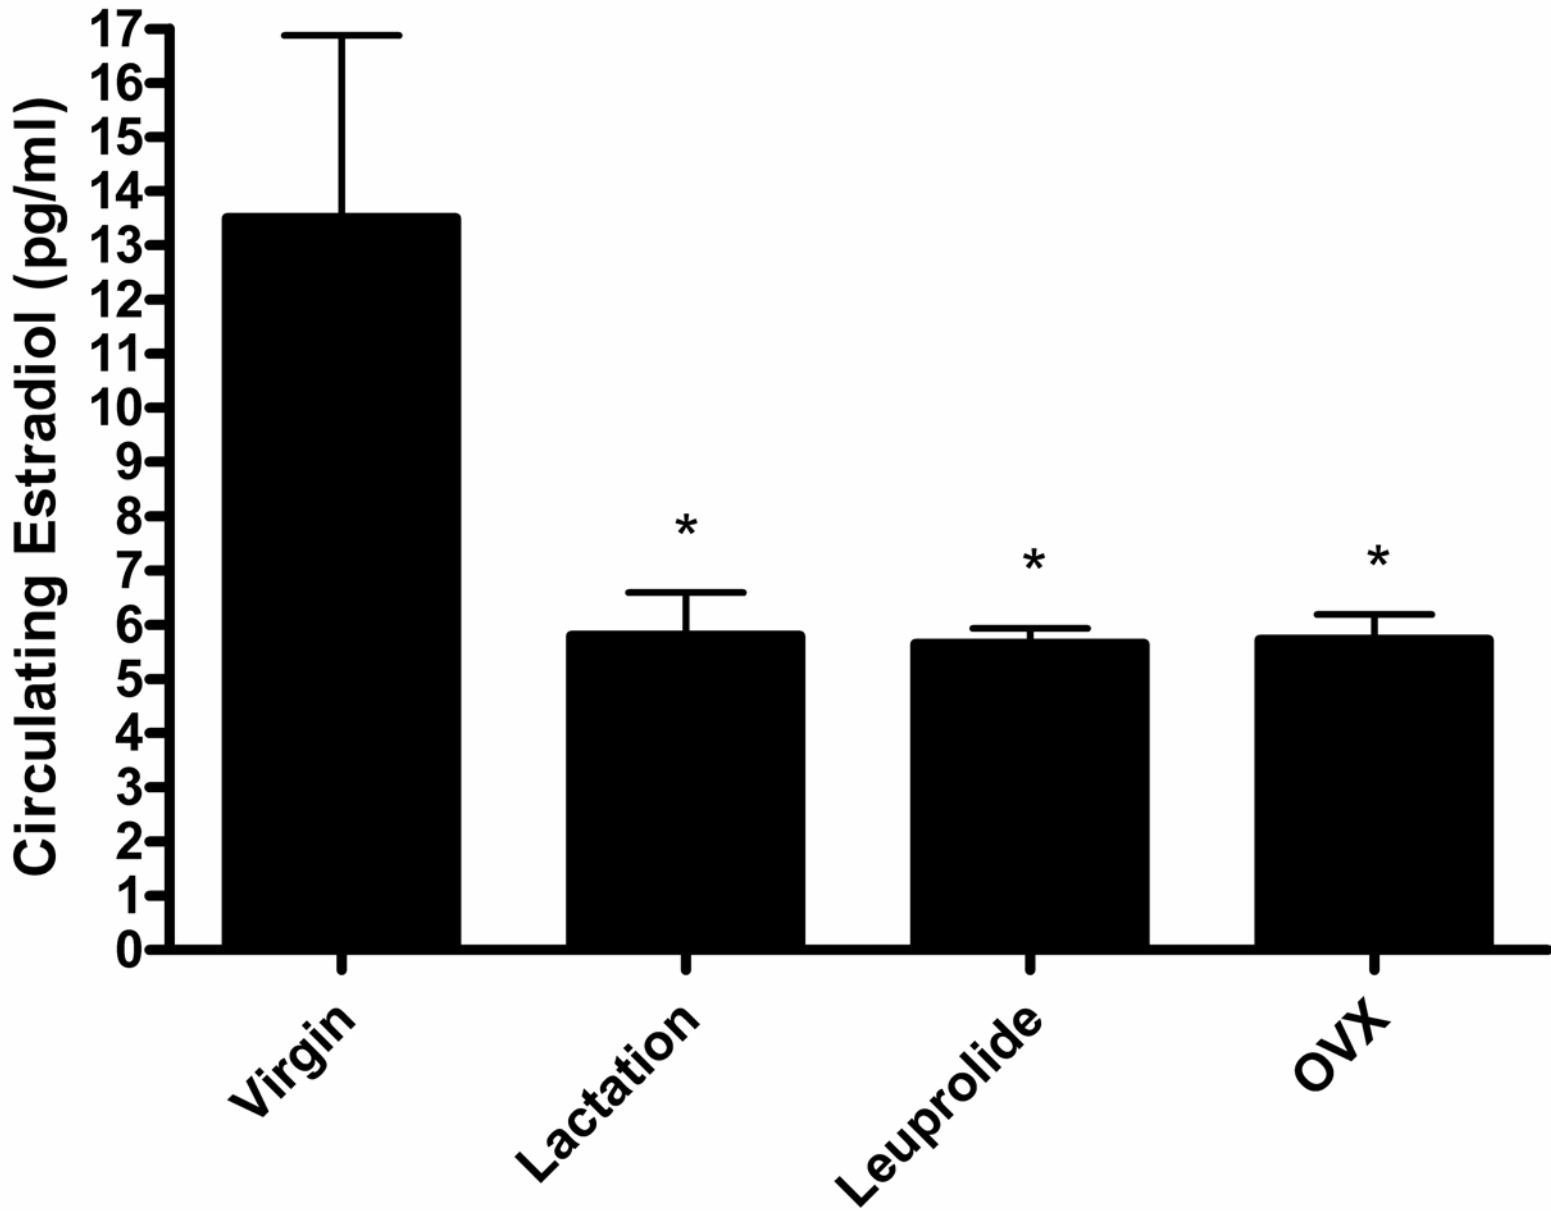

Supplement: en.2010-0566_1.pdf [file en.2010-0566_1.pdf]
